# Supplementary material for: Crop Productivity Boosters: Native Mycorrhizal Fungi from an Old-Growth Grassland Benefits Tomato (Solanum lycopersicum) and Pepper (Capsicum annuum) Varieties in Organically Farmed Soils
Source: MDPI journal article supplement (doi:10.3390/microorganisms11082012), 2023-08-04

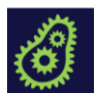

## Supplementary Materials

# Crop Productivity Boosters: Native Mycorrhizal Fungi from an Old-Growth Grassland Benefits Tomato (*Solanum lycopersicum*) and Pepper (*Capsicum annuum*) Varieties in Organically Farmed Soils

Liz Koziol \* and James D. Bever

Kansas Biological Station and Ecology and Evolutionary Biology, University of Kansas,  
Lawrence, KS 66047, USA

\* Correspondence: lizkoziol@ku.edu

**Figure S1.** Cumulative log (1+g) transformed pepper biomass for Mammoth jalapeno peppers across all thirteen harvests for inoculated (black line) and non-inoculated (grey line) plants. Points are LS means from the proc mixed model and error bars are standard error.

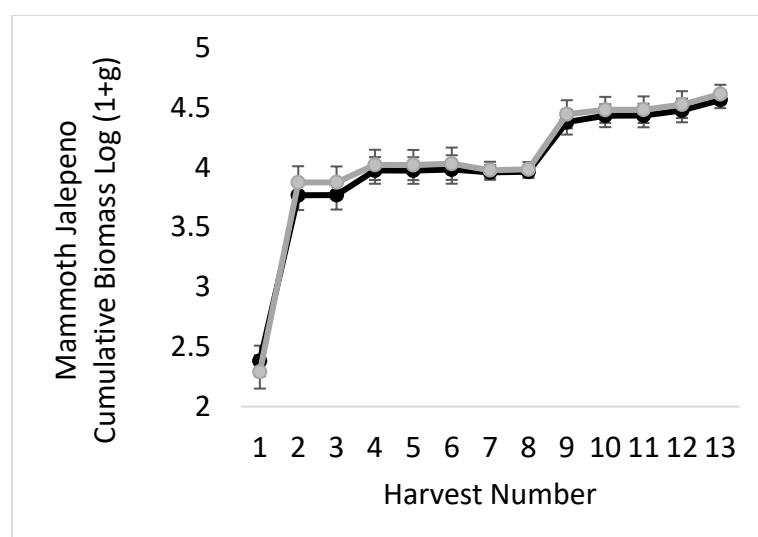

**Figure S2.** (A) total tomato biomass, (B) tomato number, and (C) average tomato size the first harvest was larger for tomato plants receiving native AM fungal inoculation (black bars) than for the non-inoculated plants (grey bars). Bars are LS means and error bars are standard error from the Proc Mixed Model outputs.

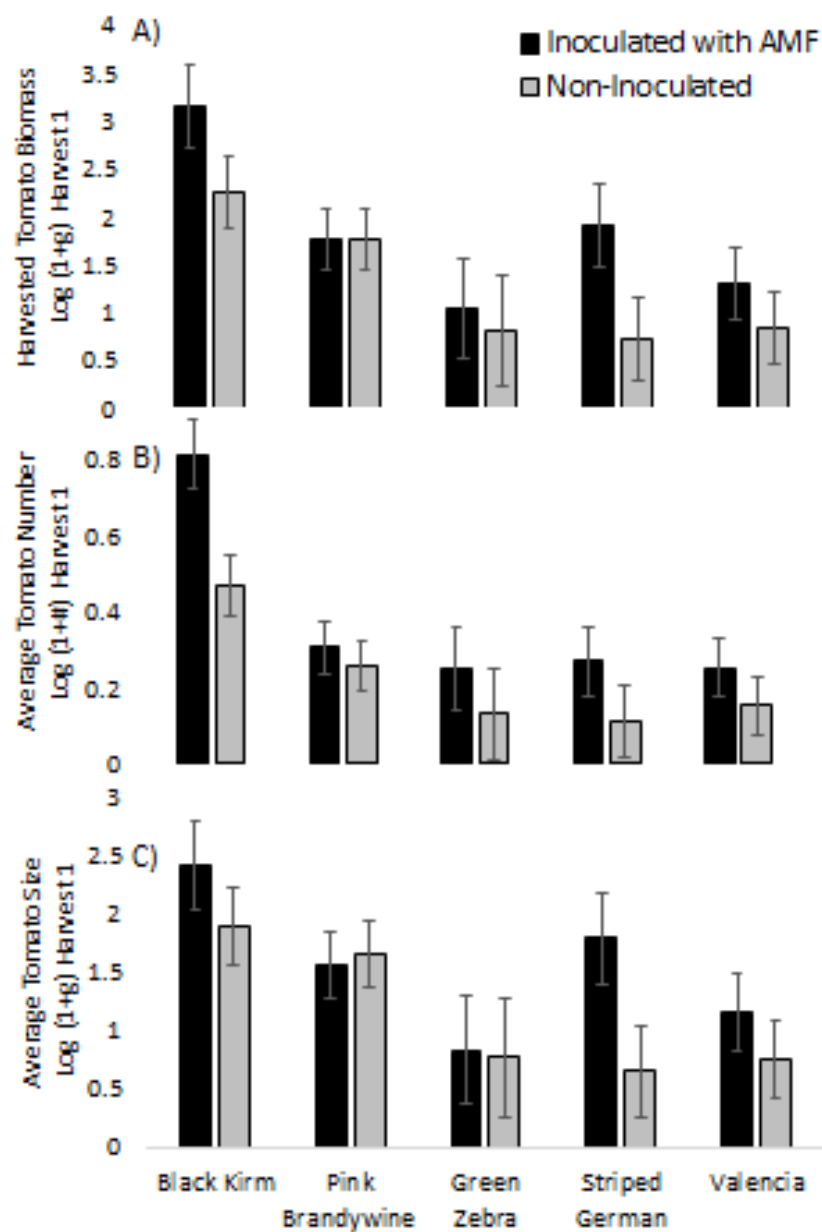

Supplement: s1 [file s1]
