# Supplementary material for: Crop Productivity Boosters: Native Mycorrhizal Fungi from an Old-Growth Grassland Benefits Tomato (Solanum lycopersicum) and Pepper (Capsicum annuum) Varieties in Organically Farmed Soils
Source: Microorganisms. 2023 Aug 4;11(8):2012. doi: 10.3390/microorganisms11082012 (PMC10457834; doi:10.3390/microorganisms11082012)
Supplement: Supplementary file 1 [file microorganisms-11-02012-s001.zip › Supplement S2 Pepper and tomato data code and outputs.xlsx]

## Sheet: Tomato Full Outputs
	TOTAL WEIGHT
			h1										h1-2									h1-3									h1-4									h1-5									h1-6
LogInitht*Variety	5	86	1.38	0.2388						LogInitht*Variety	5	86	2.53	0.0346					LogInitht*Variety	5	86	0.88	0.496					LogInitht*Variety	5	86	0.42	0.8362					LogInitht*Variety	5	86	0.41	0.8401					LogInitht*Variety	5	86	0.4
LogInlf*Variety	5	86	1.4	0.2312						LogInlf*Variety	5	86	1.51	0.1963					LogInlf*Variety	5	86	2	0.0872					LogInlf*Variety	5	86	2.21	0.0605					LogInlf*Variety	5	86	2.19	0.0629					LogInlf*Variety	5	86	2.2
Variety	4	19	2.17	0.1113						Variety	4	19	3.04	0.0428					Variety	4	19	2.33	0.093					Variety	4	19	0.93	0.4652					Variety	4	19	0.58	0.6812					Variety	4	19	0.58
Soil	1	19	5.44	0.0308						Soil	1	19	2.84	0.1084					Soil	1	19	3.37	0.0822					Soil	1	19	2.75	0.1135					Soil	1	19	1.9	0.1846					Soil	1	19	1.86
Variety*Soil	4	19	0.92	0.4724						Variety*Soil	4	19	0.32	0.8583					Variety*Soil	4	19	0.13	0.9706					Variety*Soil	4	19	0.08	0.9876					Variety*Soil	4	19	0.23	0.9169					Variety*Soil	4	19	0.23
Least Squares Means										Least Squares Means									Least Squares Means									Least Squares Means									Least Squares Means									Least Squares Means
Effect	Variety	Soil	Estimate	Standard	DF	t Value	Pr > |t|			Effect	Variety	Soil	Estimate	Standard	DF	t Value	Pr > |t|		Effect	Variety	Soil	Estimate	Standard	DF	t Value	Pr > |t|		Effect	Variety	Soil	Estimate	Standard	DF	t Value	Pr > |t|		Effect	Variety	Soil	Estimate	Standard	DF	t Value	Pr > |t|		Effect	Variety	Soil	Estimate
				Error										Error									Error									Error									Error
Soil		AMF	1.8262	0.1883	19	9.7	<.0001			Soil		AMF	2.1093	0.1622	19	13	<.0001		Soil		AMF	2.2556	0.1452	19	15.54	<.0001		Soil		AMF	2.3155	0.1366	19	16.95	<.0001		Soil		AMF	2.3953	0.1216	19	19.7	<.0001		Soil		AMF	2.4009
Soil		ST	1.2689	0.1907	19	6.65	<.0001			Soil		ST	1.7626	0.1643	19	10.73	<.0001		Soil		ST	1.9176	0.1471	19	13.04	<.0001		Soil		ST	2.018	0.1382	19	14.6	<.0001		Soil		ST	2.175	0.123	19	17.69	<.0001		Soil		ST	2.1817
Variety*Soil	Black Kirm	AMF	3.156	0.4326	19	7.3	<.0001			Variety*Soil	Black Kirm	AMF	3.3455	0.3727	19	8.98	<.0001		Variety*Soil	Black Kirm	AMF	3.3229	0.3336	19	9.96	<.0001		Variety*Soil	Black Kirm	AMF	3.3892	0.3053	19	11.1	<.0001		Variety*Soil	Black Kirm	AMF	3.429	0.2708	19	12.66	<.0001		Variety*Soil	Black Kirm	AMF	3.4424
Variety*Soil	Black Kirm	ST	2.2563	0.3803	19	5.93	<.0001			Variety*Soil	Black Kirm	ST	3.0344	0.3277	19	9.26	<.0001		Variety*Soil	Black Kirm	ST	3.067	0.2933	19	10.46	<.0001		Variety*Soil	Black Kirm	ST	3.1482	0.2746	19	11.47	<.0001		Variety*Soil	Black Kirm	ST	3.2018	0.2441	19	13.11	<.0001		Variety*Soil	Black Kirm	ST	3.2149
Variety*Soil	Brandy	AMF	1.7633	0.3179	19	5.55	<.0001			Variety*Soil	Brandy	AMF	2.124	0.2739	19	7.75	<.0001		Variety*Soil	Brandy	AMF	2.7799	0.2451	19	11.34	<.0001		Variety*Soil	Brandy	AMF	2.9783	0.2404	19	12.39	<.0001		Variety*Soil	Brandy	AMF	3.0844	0.2148	19	14.36	<.0001		Variety*Soil	Brandy	AMF	3.1019
Variety*Soil	Brandy	ST	1.7526	0.3204	19	5.47	<.0001			Variety*Soil	Brandy	ST	2.082	0.2761	19	7.54	<.0001		Variety*Soil	Brandy	ST	2.5579	0.2471	19	10.35	<.0001		Variety*Soil	Brandy	ST	2.7614	0.2417	19	11.42	<.0001		Variety*Soil	Brandy	ST	3.0117	0.2159	19	13.95	<.0001		Variety*Soil	Brandy	ST	3.0252
Variety*Soil	G zebra	AMF	1.0238	0.5202	19	1.97	0.0638			Variety*Soil	G zebra	AMF	1.0238	0.4482	19	2.28	0.034		Variety*Soil	G zebra	AMF	1.0238	0.4011	19	2.55	0.0195		Variety*Soil	G zebra	AMF	1.0268	0.3737	19	2.75	0.0128		Variety*Soil	G zebra	AMF	1.0271	0.3323	19	3.09	0.006		Variety*Soil	G zebra	AMF	1.0271
Variety*Soil	G zebra	ST	0.7973	0.5768	19	1.38	0.1829			Variety*Soil	G zebra	ST	0.7973	0.497	19	1.6	0.1252		Variety*Soil	G zebra	ST	0.7973	0.4448	19	1.79	0.089		Variety*Soil	G zebra	ST	0.7965	0.4048	19	1.97	0.0639		Variety*Soil	G zebra	ST	0.7964	0.3591	19	2.22	0.039		Variety*Soil	G zebra	ST	0.7964
Variety*Soil	St. Germane	AMF	1.8983	0.4342	19	4.37	0.0003			Variety*Soil	St. Germane	AMF	2.7639	0.3741	19	7.39	<.0001		Variety*Soil	St. Germane	AMF	2.8622	0.3348	19	8.55	<.0001		Variety*Soil	St. Germane	AMF	2.8571	0.3117	19	9.17	<.0001		Variety*Soil	St. Germane	AMF	3.1065	0.2771	19	11.21	<.0001		Variety*Soil	St. Germane	AMF	3.1034
Variety*Soil	St. Germane	ST	0.7087	0.438	19	1.62	0.1221			Variety*Soil	St. Germane	ST	2.0696	0.3774	19	5.48	<.0001		Variety*Soil	St. Germane	ST	2.3362	0.3377	19	6.92	<.0001		Variety*Soil	St. Germane	ST	2.54	0.3187	19	7.97	<.0001		Variety*Soil	St. Germane	ST	3.0195	0.2836	19	10.65	<.0001		Variety*Soil	St. Germane	ST	3.0263
Variety*Soil	Valencia	AMF	1.2895	0.3726	19	3.46	0.0026			Variety*Soil	Valencia	AMF	1.2895	0.321	19	4.02	0.0007		Variety*Soil	Valencia	AMF	1.2895	0.2873	19	4.49	0.0003		Variety*Soil	Valencia	AMF	1.3259	0.2806	19	4.73	0.0001		Variety*Soil	Valencia	AMF	1.3296	0.2506	19	5.31	<.0001		Variety*Soil	Valencia	AMF	1.33
Variety*Soil	Valencia	ST	0.8295	0.3705	19	2.24	0.0374			Variety*Soil	Valencia	ST	0.8295	0.3193	19	2.6	0.0177		Variety*Soil	Valencia	ST	0.8295	0.2858	19	2.9	0.0091		Variety*Soil	Valencia	ST	0.8438	0.2797	19	3.02	0.0071		Variety*Soil	Valencia	ST	0.8455	0.2498	19	3.38	0.0031		Variety*Soil	Valencia	ST	0.8457
			h1										h1-2									h1-3									h1-4									h1-5									h1-6
Total Tom Number
LogInitht*Variety	5	86	1.17	0.3284						LogInitht*Variety	5	86	1.69	0.1445					LogInitht*Variety	5	86	0.97	0.4379					LogInitht*Variety	5	86	0.98	0.4349					LogInitht*Variety	5	86	0.56	0.733					LogInitht*Variety	5	86	0.51
LogInlf*Variety	5	86	1.18	0.3268						LogInlf*Variety	5	86	1.39	0.2359					LogInlf*Variety	5	86	1.73	0.1352					LogInlf*Variety	5	86	2.5	0.0364					LogInlf*Variety	5	86	1.24	0.2988					LogInlf*Variety	5	86	1.41
Variety	4	19	1.82	0.167						Variety	4	19	2.66	0.0642					Variety	4	19	2.27	0.0991					Variety	4	19	2.41	0.085					Variety	4	19	1.08	0.3941					Variety	4	19	1.18
Soil	1	19	9.25	0.0067						Soil	1	19	5.28	0.0331					Soil	1	19	7.36	0.0138					Soil	1	19	5.29	0.033					Soil	1	19	3.72	0.0689					Soil	1	19	3.54
Variety*Soil	4	19	1.27	0.3179						Variety*Soil	4	19	0.77	0.5576					Variety*Soil	4	19	0.22	0.9222					Variety*Soil	4	19	0.29	0.8801					Variety*Soil	4	19	0.49	0.7408					Variety*Soil	4	19	0.48
Least Squares Means										Least Squares Means									Least Squares Means									Least Squares Means									Least Squares Means									Least Squares Means
Effect	Variety	Soil	Estimate	Standard	DF	t Value	Pr > |t|			Effect	Variety	Soil	Estimate	Standard	DF	t Value	Pr > |t|		Effect	Variety	Soil	Estimate	Standard	DF	t Value	Pr > |t|		Effect	Variety	Soil	Estimate	Standard	DF	t Value	Pr > |t|		Effect	Variety	Soil	Estimate	Standard	DF	t Value	Pr > |t|		Effect	Variety	Soil	Estimate
				Error										Error									Error									Error									Error
Soil		AMF	0.3784	0.03986	19	9.49	<.0001			Soil		AMF	0.4461	0.04107	19	10.86	<.0001		Soil		AMF	0.5003	0.03986	19	12.55	<.0001		Soil		AMF	0.5268	0.03927	19	13.41	<.0001		Soil		AMF	0.6067	0.04129	19	14.7	<.0001		Soil		AMF	0.6159
Soil		ST	0.2234	0.04037	19	5.54	<.0001			Soil		ST	0.325	0.04158	19	7.82	<.0001		Soil		ST	0.3623	0.04036	19	8.98	<.0001		Soil		ST	0.4083	0.03973	19	10.28	<.0001		Soil		ST	0.5016	0.04175	19	12.01	<.0001		Soil		ST	0.5103
Variety*Soil	Black Kirm	AMF	0.8145	0.09115	19	8.94	<.0001			Variety*Soil	Black Kirm	AMF	0.9221	0.09362	19	9.85	<.0001		Variety*Soil	Black Kirm	AMF	0.9169	0.09123	19	10.05	<.0001		Variety*Soil	Black Kirm	AMF	0.9765	0.08779	19	11.12	<.0001		Variety*Soil	Black Kirm	AMF	1.078	0.09167	19	11.76	<.0001		Variety*Soil	Black Kirm	AMF	1.1016
Variety*Soil	Black Kirm	ST	0.4697	0.08048	19	5.84	<.0001			Variety*Soil	Black Kirm	ST	0.6553	0.08288	19	7.91	<.0001		Variety*Soil	Black Kirm	ST	0.694	0.08049	19	8.62	<.0001		Variety*Soil	Black Kirm	ST	0.7649	0.07894	19	9.69	<.0001		Variety*Soil	Black Kirm	ST	0.86	0.08285	19	10.38	<.0001		Variety*Soil	Black Kirm	ST	0.8849
Variety*Soil	Brandy	AMF	0.3044	0.06793	19	4.48	0.0003			Variety*Soil	Brandy	AMF	0.3878	0.07035	19	5.51	<.0001		Variety*Soil	Brandy	AMF	0.5971	0.06781	19	8.81	<.0001		Variety*Soil	Brandy	AMF	0.6333	0.06911	19	9.16	<.0001		Variety*Soil	Brandy	AMF	0.7438	0.0732	19	10.16	<.0001		Variety*Soil	Brandy	AMF	0.7693
Variety*Soil	Brandy	ST	0.2562	0.06843	19	3.74	0.0014			Variety*Soil	Brandy	ST	0.3694	0.07085	19	5.21	<.0001		Variety*Soil	Brandy	ST	0.4815	0.06831	19	7.05	<.0001		Variety*Soil	Brandy	ST	0.538	0.06949	19	7.74	<.0001		Variety*Soil	Brandy	ST	0.6556	0.07357	19	8.91	<.0001		Variety*Soil	Brandy	ST	0.6711
Variety*Soil	G zebra	AMF	0.2518	0.1098	19	2.29	0.0334			Variety*Soil	G zebra	AMF	0.2522	0.113	19	2.23	0.0379		Variety*Soil	G zebra	AMF	0.2517	0.1099	19	2.29	0.0336		Variety*Soil	G zebra	AMF	0.2537	0.1074	19	2.36	0.029		Variety*Soil	G zebra	AMF	0.2541	0.1128	19	2.25	0.0363		Variety*Soil	G zebra	AMF	0.2543
Variety*Soil	G zebra	ST	0.13	0.1212	19	1.07	0.297			Variety*Soil	G zebra	ST	0.1303	0.1244	19	1.05	0.3079		Variety*Soil	G zebra	ST	0.1299	0.1214	19	1.07	0.298		Variety*Soil	G zebra	ST	0.1318	0.1164	19	1.13	0.2717		Variety*Soil	G zebra	ST	0.1321	0.1216	19	1.09	0.2908		Variety*Soil	G zebra	ST	0.1323
Variety*Soil	St. Germane	AMF	0.2692	0.09171	19	2.94	0.0085			Variety*Soil	St. Germane	AMF	0.4155	0.09435	19	4.4	0.0003		Variety*Soil	St. Germane	AMF	0.4839	0.09174	19	5.28	<.0001		Variety*Soil	St. Germane	AMF	0.5139	0.08962	19	5.73	<.0001		Variety*Soil	St. Germane	AMF	0.7002	0.09405	19	7.45	<.0001		Variety*Soil	St. Germane	AMF	0.6965
Variety*Soil	St. Germane	ST	0.1096	0.0928	19	1.18	0.2523			Variety*Soil	St. Germane	ST	0.3179	0.09565	19	3.32	0.0036		Variety*Soil	St. Germane	ST	0.3543	0.09278	19	3.82	0.0012		Variety*Soil	St. Germane	ST	0.453	0.09161	19	4.95	<.0001		Variety*Soil	St. Germane	ST	0.7062	0.09632	19	7.33	<.0001		Variety*Soil	St. Germane	ST	0.7086
Variety*Soil	Valencia	AMF	0.2523	0.07955	19	3.17	0.005			Variety*Soil	Valencia	AMF	0.253	0.08234	19	3.07	0.0063		Variety*Soil	Valencia	AMF	0.2521	0.07942	19	3.17	0.005		Variety*Soil	Valencia	AMF	0.2564	0.08066	19	3.18	0.0049		Variety*Soil	Valencia	AMF	0.2574	0.08536	19	3.02	0.0071		Variety*Soil	Valencia	AMF	0.2579
Variety*Soil	Valencia	ST	0.1517	0.07915	19	1.92	0.0704			Variety*Soil	Valencia	ST	0.152	0.08195	19	1.85	0.0792		Variety*Soil	Valencia	ST	0.1516	0.07902	19	1.92	0.0701		Variety*Soil	Valencia	ST	0.1536	0.08039	19	1.91	0.0712		Variety*Soil	Valencia	ST	0.1541	0.08511	19	1.81	0.086		Variety*Soil	Valencia	ST	0.1544
			h1										h1-2									h1-3									h1-4									h1-5									h1-6
average Tom size
LogInitht*Variety	5	86	1.31	0.2661						LogInitht*Variety	5	86	2.43	0.0415					LogInitht*Variety	5	86	0.64	0.6733					LogInitht*Variety	5	86	0.38	0.8642					LogInitht*Variety	5	86	0.71	0.6162					LogInitht*Variety	5	86	0.68
LogInlf*Variety	5	86	1.37	0.2452						LogInlf*Variety	5	86	1.42	0.2257					LogInlf*Variety	5	86	1.92	0.0994					LogInlf*Variety	5	86	1.89	0.1044					LogInlf*Variety	5	86	2.17	0.0644					LogInlf*Variety	5	86	2.14
Variety	4	19	2.06	0.127						Variety	4	19	2.64	0.0663					Variety	4	19	1.79	0.172					Variety	4	19	0.36	0.8361					Variety	4	19	0.35	0.8438					Variety	4	19	0.31
Soil	1	19	3.73	0.0684						Soil	1	19	1.58	0.224					Soil	1	19	1.32	0.2647					Soil	1	19	1.28	0.2728					Soil	1	19	0.71	0.4106					Soil	1	19	0.69
Variety*Soil	4	19	1.07	0.3988						Variety*Soil	4	19	0.59	0.6728					Variety*Soil	4	19	0.31	0.8652					Variety*Soil	4	19	0.28	0.8855					Variety*Soil	4	19	0.48	0.747					Variety*Soil	4	19	0.47
Least Squares Means										Least Squares Means									Least Squares Means									Least Squares Means									Least Squares Means									Least Squares Means
Effect	Variety	Soil	Estimate	Standard	DF	t Value	Pr > |t|			Effect	Variety	Soil	Estimate	Standard	DF	t Value	Pr > |t|		Effect	Variety	Soil	Estimate	Standard	DF	t Value	Pr > |t|		Effect	Variety	Soil	Estimate	Standard	DF	t Value	Pr > |t|		Effect	Variety	Soil	Estimate	Standard	DF	t Value	Pr > |t|		Effect	Variety	Soil	Estimate
				Error										Error									Error									Error									Error
Soil		AMF	1.5494	0.167	19	9.28	<.0001			Soil		AMF	1.7764	0.1403	19	12.66	<.0001		Soil		AMF	1.8617	0.1249	19	14.91	<.0001		Soil		AMF	1.8913	0.1231	19	15.37	<.0001		Soil		AMF	1.8786	0.1259	19	14.92	<.0001		Soil		AMF	1.8734
Soil		ST	1.1399	0.1692	19	6.74	<.0001			Soil		ST	1.5527	0.1421	19	10.93	<.0001		Soil		ST	1.679	0.1265	19	13.28	<.0001		Soil		ST	1.7248	0.1243	19	13.88	<.0001		Soil		ST	1.7719	0.1267	19	13.98	<.0001		Soil		ST	1.7672
Variety*Soil	Black Kirm	AMF	2.4219	0.3838	19	6.31	<.0001			Variety*Soil	Black Kirm	AMF	2.4808	0.3223	19	7.7	<.0001		Variety*Soil	Black Kirm	AMF	2.472	0.2863	19	8.63	<.0001		Variety*Soil	Black Kirm	AMF	2.477	0.2591	19	9.56	<.0001		Variety*Soil	Black Kirm	AMF	2.4246	0.2341	19	10.36	<.0001		Variety*Soil	Black Kirm	AMF	2.4084
Variety*Soil	Black Kirm	ST	1.8896	0.3374	19	5.6	<.0001			Variety*Soil	Black Kirm	ST	2.5043	0.2834	19	8.84	<.0001		Variety*Soil	Black Kirm	ST	2.4859	0.2522	19	9.86	<.0001		Variety*Soil	Black Kirm	ST	2.489	0.2327	19	10.7	<.0001		Variety*Soil	Black Kirm	ST	2.4372	0.2119	19	11.5	<.0001		Variety*Soil	Black Kirm	ST	2.4189
Variety*Soil	Brandy	AMF	1.5659	0.282	19	5.55	<.0001			Variety*Soil	Brandy	AMF	1.86	0.2369	19	7.85	<.0001		Variety*Soil	Brandy	AMF	2.3115	0.2117	19	10.92	<.0001		Variety*Soil	Brandy	AMF	2.4805	0.2033	19	12.2	<.0001		Variety*Soil	Brandy	AMF	2.4383	0.1876	19	13	<.0001		Variety*Soil	Brandy	AMF	2.4266
Variety*Soil	Brandy	ST	1.643	0.2843	19	5.78	<.0001			Variety*Soil	Brandy	ST	1.837	0.2387	19	7.69	<.0001		Variety*Soil	Brandy	ST	2.2254	0.2134	19	10.43	<.0001		Variety*Soil	Brandy	ST	2.3806	0.2044	19	11.64	<.0001		Variety*Soil	Brandy	ST	2.4991	0.1885	19	13.26	<.0001		Variety*Soil	Brandy	ST	2.4884
Variety*Soil	G zebra	AMF	0.8257	0.4615	19	1.79	0.0895			Variety*Soil	G zebra	AMF	0.8257	0.3876	19	2.13	0.0464		Variety*Soil	G zebra	AMF	0.8256	0.3446	19	2.4	0.027		Variety*Soil	G zebra	AMF	0.8412	0.3157	19	2.66	0.0153		Variety*Soil	G zebra	AMF	0.8701	0.283	19	3.07	0.0062		Variety*Soil	G zebra	AMF	0.8682
Variety*Soil	G zebra	ST	0.7628	0.5118	19	1.49	0.1525			Variety*Soil	G zebra	ST	0.7628	0.4298	19	1.77	0.092		Variety*Soil	G zebra	ST	0.7621	0.3813	19	2	0.0601		Variety*Soil	G zebra	ST	0.7639	0.3428	19	2.23	0.0381		Variety*Soil	G zebra	ST	0.7799	0.3059	19	2.55	0.0196		Variety*Soil	G zebra	ST	0.7798
Variety*Soil	St. Germane	AMF	1.7874	0.3852	19	4.64	0.0002			Variety*Soil	St. Germane	AMF	2.5693	0.3235	19	7.94	<.0001		Variety*Soil	St. Germane	AMF	2.5496	0.2877	19	8.86	<.0001		Variety*Soil	St. Germane	AMF	2.4772	0.2665	19	9.3	<.0001		Variety*Soil	St. Germane	AMF	2.4724	0.2433	19	10.16	<.0001		Variety*Soil	St. Germane	AMF	2.4752
Variety*Soil	St. Germane	ST	0.651	0.3886	19	1.68	0.1102			Variety*Soil	St. Germane	ST	1.9061	0.3263	19	5.84	<.0001		Variety*Soil	St. Germane	ST	2.1668	0.2906	19	7.46	<.0001		Variety*Soil	St. Germane	ST	2.2239	0.271	19	8.21	<.0001		Variety*Soil	St. Germane	ST	2.373	0.2462	19	9.64	<.0001		Variety*Soil	St. Germane	ST	2.3782
Variety*Soil	Valencia	AMF	1.1462	0.3306	19	3.47	0.0026			Variety*Soil	Valencia	AMF	1.1462	0.2776	19	4.13	0.0006		Variety*Soil	Valencia	AMF	1.1498	0.2481	19	4.63	0.0002		Variety*Soil	Valencia	AMF	1.1807	0.237	19	4.98	<.0001		Variety*Soil	Valencia	AMF	1.1876	0.2163	19	5.49	<.0001		Variety*Soil	Valencia	AMF	1.1888
Variety*Soil	Valencia	ST	0.7534	0.3288	19	2.29	0.0335			Variety*Soil	Valencia	ST	0.7534	0.2761	19	2.73	0.0133		Variety*Soil	Valencia	ST	0.7546	0.2468	19	3.06	0.0065		Variety*Soil	Valencia	ST	0.7668	0.2362	19	3.25	0.0042		Variety*Soil	Valencia	ST	0.7701	0.2157	19	3.57	0.002		Variety*Soil	Valencia	ST	0.7707
[truncated: 12 more columns]

## Sheet: Tomato Code
/* Generated Code (IMPORT) */
/* Source File: Tom Full 5.19.23.xlsx */
/* Source Path: /home/u49292986/NSF PFI projects/TOM hoop house 2020/Best code */
/* Code generated on: 5/19/23, 2:48 PM */
%web_drop_table(WORK.IMPORT1);
FILENAME REFFILE '/home/u49292986/NSF PFI projects/TOM hoop house 2020/Final Code/Tom Final Biomass.xlsx';
PROC IMPORT DATAFILE=REFFILE
	DBMS=XLSX
	OUT=WORK.IMPORT1;
	GETNAMES=YES;
RUN;
PROC CONTENTS DATA=WORK.IMPORT1; RUN;
%web_open_table(WORK.IMPORT1);
/* Har12TotwtLOG	Har12NumTotalNumLOG	har12avgTOMsizeLOG
Har13TotwtLOG	Har13NumTotalNumLOG	har13avgTOMsizeLOG
Har14TotwtLOG	Har14NumTotalNumLOG	har14avgTOMsizeLOG
Har15TotwtLOG	Har16NumTotalNumLOG	har15avgTOMsizeLOG
Har16TotwtLOG	Har16NumTotalNumLOG	har16avgTOMsizeLOG
Har1TotwtLOG	Har1NumTotalNumLOG	har1avgTOMsizeLOG
Har2TotwtLOG	Har2NumTotalNumLOG	har2avgTOMsizeLOG
Har3TotwtLOG	Har3NumTotalNumLOG	har3avgTOMsizeLOG
Har4TotwtLOG	Har4NumTotalNumLOG	har4avgTOMsizeLOG
Har5TotwtLOG	Har5NumTotalNumLOG	har5avgTOMsizeLOG
Har6TotwtLOG	Har6NumTotalNumLOG	har6avgTOMsizeLOG
Har7TotwtLOG	Har7NumTotalNumLOG	har7avgTOMsizeLOG
TotalWtLOG	TotalTomNumLOG	TOTALavgtomsizeLOG
*/
proc mixed ; class Variety	Row		Soil FieldBlock
;
model TOTALavgtomsizeLOG
= LogInitht*Variety LogInlf*Variety Variety Soil Soil*Variety;
random FieldBlock FieldBlock*row*soil*variety ;
lsmeans Soil Soil*Variety ;
run;

## Sheet: Tomato Data Sheet
Variety	Row	FieldBlock	Soil	Ht1	Lf1	LogInitht	LogInlf	TotalWt	TotalTomNum	avgtomsize	Har1Totwt	Har1NumTotalNum	har1avgTOMsize	Har2Totwt	Har2NumTotalNum	har2avgTOMsize	Har3Totwt	Har3NumTotalNum	har3avgTOMsize	Har4Totwt	Har4NumTotalNum	har4avgTOMsize	Har5Totwt	Har5NumTotalNum	har5avgTOMsize	Har6Totwt	Har6NumTotalNum	har6avgTOMsize	Har7Totwt	Har7NumTotalNum	har7avgTOMsize	Har12Totwt	Har12NumTotalNum	har12avgTOMsize	Har13Totwt	Har13NumTotalNum	har13avgTOMsize	Har14Totwt	Har14NumTotalNum	har14avgTOMsize	Har15Totwt	Har15NumTotalNum	har15avgTOMsize	Har16Totwt	Har16NumTotalNum	har16avgTOMsize	Har12TotwtLOG	Har12NumTotalNumLOG	har12avgTOMsizeLOG
Brandy	1	1	AMF	49	6	1.69897	0.845098	1638	6	273	911	2	455.5	0	0	0	404	1	404	0	0	0	150	1	150	173	2	86.5	0	0	0	911	2	455.5	1315	3	438.333	1315	3	438.333	1465	4	366.25	1638	6	273	2.95999	0.477121	2.65944
Brandy	1	1	AMF	39	5	1.60206	0.778151	956	4	239	0	0	0	401	1	401	241	1	241	0	0	0	314	2	157	0	0	0	0	0	0	401	1	401	642	2	321	642	2	321	956	4	239	956	4	239	2.60423	0.30103	2.60423
Brandy	1	1	AMF	38	6	1.59106	0.845098	2358	9	262	702	2	351	316	1	316	1033	4	258.25	0	0	0	177	1	177	130	1	130	0	0	0	1018	3	339.333	2051	7	293	2051	7	293	2228	8	278.5	2358	9	262	3.00817	0.60206	2.5319
Brandy	1	1	AMF	34	6	1.54407	0.845098	3429	12	285.75	1395	3	465	343	1	343	1161	4	290.25	0	0	0	203	2	101.5	191	1	191	136	1	136	1738	4	434.5	2899	8	362.375	2899	8	362.375	3102	10	310.2	3293	11	299.364	3.2403	0.69897	2.63899
Brandy	1	1	ST	39	8	1.60206	0.954243	1620	5	324	415	1	415	716	2	358	489	2	244.5	0	0	0	0	0	0	0	0	0	0	0	0	1131	3	377	1620	5	324	1620	5	324	1620	5	324	1620	5	324	3.05385	0.60206	2.57749
Brandy	1	1	ST	31	6	1.50515	0.845098	619	2	309.5	458	1	458	0	0	0	0	0	0	161	1	161	0	0	0	0	0	0	0	0	0	458	1	458	458	1	458	619	2	309.5	619	2	309.5	619	2	309.5	2.66181	0.30103	2.66181
Brandy	1	1	ST	34	5	1.54407	0.778151	783	4	195.75	0	0	0	0	0	0	281	1	281	0	0	0	364	2	182	0	0	0	138	1	138	0	0	0	281	1	281	281	1	281	645	3	215	645	3	215	0	0	0
Brandy	1	1	ST	36	5	1.5682	0.778151	1882	4	470.5	1103	2	551.5	392	1	392	0	0	0	0	0	0	387	1	387	0	0	0	0	0	0	1495	3	498.333	1495	3	498.333	1495	3	498.333	1882	4	470.5	1882	4	470.5	3.17493	0.60206	2.69839
Brandy	1	2	AMF	34	7	1.54407	0.90309	2023	5	404.6	1437	3	479	0	0	0	296	1	296	0	0	0	290	1	290	0	0	0	0	0	0	1437	3	479	1733	4	433.25	1733	4	433.25	2023	5	404.6	2023	5	404.6	3.15776	0.60206	2.68124
Brandy	1	2	AMF	34	6	1.54407	0.845098	3205	13	246.538	636	2	318	1243	3	414.333	386	2	193	198	1	198	520	4	130	222	1	222	0	0	0	1879	5	375.8	2265	7	323.571	2463	8	307.875	2983	12	248.583	3205	13	246.538	3.27416	0.778151	2.57611
Brandy	1	2	AMF	41	6	1.62325	0.845098	1341	5	268.2	646	2	323	0	0	0	695	3	231.667	0	0	0	0	0	0	0	0	0	0	0	0	646	2	323	1341	5	268.2	1341	5	268.2	1341	5	268.2	1341	5	268.2	2.8109	0.477121	2.51055
Brandy	1	2	AMF	39	5	1.60206	0.778151	1274	4	318.5	739	2	369.5	0	0	0	308	1	308	0	0	0	227	1	227	0	0	0	0	0	0	739	2	369.5	1047	3	349	1047	3	349	1274	4	318.5	1274	4	318.5	2.86923	0.477121	2.56879
Brandy	1	2	ST	40	5	1.61278	0.778151	1706	4	426.5	0	0	0	1706	4	426.5	0	0	0	0	0	0	0	0	0	0	0	0	0	0	0	1706	4	426.5	1706	4	426.5	1706	4	426.5	1706	4	426.5	1706	4	426.5	3.23223	0.69897	2.63094
Brandy	1	2	ST	41	6	1.62325	0.845098	3321	10	332.1	1219	3	406.333	0	0	0	0	0	0	583	2	291.5	1262	4	315.5	257	1	257	0	0	0	1219	3	406.333	1219	3	406.333	1802	5	360.4	3064	9	340.444	3321	10	332.1	3.08636	0.60206	2.60995
Brandy	1	2	ST	29	6	1.47712	0.845098	2459	9	273.222	507	1	507	0	0	0	908	3	302.667	0	0	0	801	4	200.25	0	0	0	243	1	243	507	1	507	1415	4	353.75	1415	4	353.75	2216	8	277	2216	8	277	2.70586	0.30103	2.70586
Brandy	1	2	ST	37	6	1.57978	0.845098	1269	4	317.25	367	1	367	786	2	393	0	0	0	116	1	116	0	0	0	0	0	0	0	0	0	1153	3	384.333	1153	3	384.333	1269	4	317.25	1269	4	317.25	1269	4	317.25	3.06221	0.60206	2.58584
Brandy	1	3	AMF	26	6	1.43136	0.845098	1455	5	291	485	1	485	195	1	195	458	2	229	0	0	0	0	0	0	317	1	317	0	0	0	680	2	340	1138	4	284.5	1138	4	284.5	1138	4	284.5	1455	5	291	2.83315	0.477121	2.53275
Brandy	1	3	AMF	32	6	1.51851	0.845098	840	3	280	522	2	261	0	0	0	0	0	0	0	0	0	318	1	318	0	0	0	0	0	0	522	2	261	522	2	261	522	2	261	840	3	280	840	3	280	2.7185	0.477121	2.4183
Brandy	1	3	AMF	30	7	1.49136	0.90309	836	4	209	0	0	0	0	0	0	205	1	205	197	1	197	303	1	303	0	0	0	131	1	131	0	0	0	205	1	205	402	2	201	705	3	235	705	3	235	0	0	0
Brandy	1	3	AMF	29	7	1.47712	0.90309	1402	7	200.286	0	0	0	0	0	0	709	3	236.333	0	0	0	386	2	193	102	1	102	205	1	205	0	0	0	709	3	236.333	709	3	236.333	1095	5	219	1197	6	199.5	0	0	0
Brandy	1	3	ST	27.5	7	1.45484	0.90309	3352	9	372.444	1000	2	500	1128	3	376	669	2	334.5	0	0	0	310	1	310	245	1	245	0	0	0	2128	5	425.6	2797	7	399.571	2797	7	399.571	3107	8	388.375	3352	9	372.444	3.32818	0.778151	2.63002
Brandy	1	3	ST	35	7	1.5563	0.90309	849	3	283	0	0	0	0	0	0	0	0	0	579	2	289.5	270	1	270	0	0	0	0	0	0	0	0	0	0	0	0	579	2	289.5	849	3	283	849	3	283	0	0	0
Brandy	1	3	ST	29	7	1.47712	0.90309	3957	12	329.75	2121	5	424.2	0	0	0	869	3	289.667	0	0	0	967	4	241.75	0	0	0	0	0	0	2121	5	424.2	2990	8	373.75	2990	8	373.75	3957	12	329.75	3957	12	329.75	3.32675	0.778151	2.62859
Brandy	1	3	ST	32	7	1.51851	0.90309	933	2	466.5	642	1	642	0	0	0	0	0	0	0	0	0	0	0	0	291	1	291	0	0	0	642	1	642	642	1	642	642	1	642	642	1	642	933	2	466.5	2.80821	0.30103	2.80821
Brandy	1	4	AMF	33	7	1.53148	0.90309	1782	7	254.571	703	3	234.333	463	1	463	466	2	233	0	0	0	150	1	150	0	0	0	0	0	0	1166	4	291.5	1632	6	272	1632	6	272	1782	7	254.571	1782	7	254.571	3.06707	0.69897	2.46613
Brandy	1	4	AMF	19	4	1.30103	0.69897	612	2	306	0	0	0	0	0	0	0	0	0	376	1	376	236	1	236	0	0	0	0	0	0	0	0	0	0	0	0	376	1	376	612	2	306	612	2	306	0	0	0
Brandy	1	4	AMF	29	7	1.47712	0.90309	261	1	261	0	0	0	261	1	261	0	0	0	0	0	0	0	0	0	0	0	0	0	0	0	261	1	261	261	1	261	261	1	261	261	1	261	261	1	261	2.4183	0.30103	2.4183
Brandy	1	4	AMF	27	6	1.44716	0.845098	1322	5	264.4	0	0	0	0	0	0	637	2	318.5	0	0	0	685	3	228.333	0	0	0	0	0	0	0	0	0	637	2	318.5	637	2	318.5	1322	5	264.4	1322	5	264.4	0	0	0
Brandy	1	4	ST	32	7	1.51851	0.90309	365	1	365	0	0	0	0	0	0	365	1	365	0	0	0	0	0	0	0	0	0	0	0	0	0	0	0	365	1	365	365	1	365	365	1	365	365	1	365	0	0	0
Brandy	1	4	ST	30	6	1.49136	0.845098	186	1	186	0	0	0	0	0	0	0	0	0	0	0	0	186	1	186	0	0	0	0	0	0	0	0	0	0	0	0	0	0	0	186	1	186	186	1	186	0	0	0
Brandy	1	4	ST	28	6	1.4624	0.845098	447	2	223.5	236	1	236	0	0	0	0	0	0	0	0	0	211	1	211	0	0	0	0	0	0	236	1	236	236	1	236	236	1	236	447	2	223.5	447	2	223.5	2.37475	0.30103	2.37475
Brandy	1	4	ST	15	6	1.20412	0.845098	407	3	135.667	0	0	0	0	0	0	339	2	169.5	0	0	0	68	1	68	0	0	0	0	0	0	0	0	0	339	2	169.5	339	2	169.5	407	3	135.667	407	3	135.667	0	0	0
St. Germane	2	1	AMF	36	5	1.5682	0.778151	2094	6	349	721	3	240.333	1373	3	457.667	0	0	0	0	0	0	0	0	0	0	0	0	0	0	0	2094	6	349	2094	6	349	2094	6	349	2094	6	349	2094	6	349	3.32118	0.845098	2.54407
St. Germane	2	1	AMF	30	4	1.49136	0.69897	1353	5	270.6	852	2	426	274	2	137	0	0	0	0	0	0	227	1	227	0	0	0	0	0	0	1126	4	281.5	1126	4	281.5	1126	4	281.5	1353	5	270.6	1353	5	270.6	3.05192	0.69897	2.45102
St. Germane	2	1	AMF	30	5	1.49136	0.778151	1703	3	567.667	1451	2	725.5	252	1	252	0	0	0	0	0	0	0	0	0	0	0	0	0	0	0	1703	3	567.667	1703	3	567.667	1703	3	567.667	1703	3	567.667	1703	3	567.667	3.23147	0.60206	2.75486
St. Germane	2	1	AMF	26	4	1.43136	0.69897	2290	10	229	1222	3	407.333	473	2	236.5	0	0	0	0	0	0	497	4	124.25	98	1	98	0	0	0	1695	5	339	1695	5	339	1695	5	339	2192	9	243.556	2290	10	229	3.22943	0.778151	2.53148
St. Germane	2	1	ST	35	7	1.5563	0.90309	551	2	275.5	0	0	0	350	1	350	0	0	0	0	0	0	201	1	201	0	0	0	0	0	0	350	1	350	350	1	350	350	1	350	551	2	275.5	551	2	275.5	2.54531	0.30103	2.54531
St. Germane	2	1	ST	35	4	1.5563	0.69897	5379	16	336.188	947	3	315.667	2657	6	442.833	796	2	398	276	1	276	703	4	175.75	0	0	0	0	0	0	3604	9	400.444	4400	11	400	4676	12	389.667	5379	16	336.188	5379	16	336.188	3.55691	1	2.60363
St. Germane	2	1	ST	37	6	1.57978	0.845098	983	6	163.833	0	0	0	0	0	0	0	0	0	0	0	0	983	6	163.833	0	0	0	0	0	0	0	0	0	0	0	0	0	0	0	983	6	163.833	983	6	163.833	0	0	0
St. Germane	2	1	ST	26	5	1.43136	0.778151	2886	12	240.5	1271	3	423.667	256	1	256	0	0	0	0	0	0	1359	8	169.875	0	0	0	0	0	0	1527	4	381.75	1527	4	381.75	1527	4	381.75	2886	12	240.5	2886	12	240.5	3.18412	0.69897	2.58292
G zebra	2	2	AMF	30	6	1.49136	0.845098	0	0	0	0	0	0	0	0	0	0	0	0	0	0	0	0	0	0	0	0	0	0	0	0	0	0	0	0	0	0	0	0	0	0	0	0	0	0	0	0	0	0
G zebra	2	2	AMF	30	7	1.49136	0.90309	364	4	91	364	4	91	0	0	0	0	0	0	0	0	0	0	0	0	0	0	0	0	0	0	364	4	91	364	4	91	364	4	91	364	4	91	364	4	91	2.56229	0.69897	1.96379
G zebra	2	2	AMF	23	6	1.38021	0.845098	610	5	122	610	5	122	0	0	0	0	0	0	0	0	0	0	0	0	0	0	0	0	0	0	610	5	122	610	5	122	610	5	122	610	5	122	610	5	122	2.78604	0.778151	2.08991
G zebra	2	2	AMF	21	6	1.34242	0.845098	0	0	0	0	0	0	0	0	0	0	0	0	0	0	0	0	0	0	0	0	0	0	0	0	0	0	0	0	0	0	0	0	0	0	0	0	0	0	0	0	0	0
G zebra	2	2	ST	22	5	1.36173	0.778151	0	0	0	0	0	0	0	0	0	0	0	0	0	0	0	0	0	0	0	0	0	0	0	0	0	0	0	0	0	0	0	0	0	0	0	0	0	0	0	0	0	0
G zebra	2	2	ST	8	4	0.954243	0.69897	66	1	66	66	1	66	0	0	0	0	0	0	0	0	0	0	0	0	0	0	0	0	0	0	66	1	66	66	1	66	66	1	66	66	1	66	66	1	66	1.82607	0.30103	1.82607
G zebra	2	2	ST	28	6	1.4624	0.845098	121	1	121	121	1	121	0	0	0	0	0	0	0	0	0	0	0	0	0	0	0	0	0	0	121	1	121	121	1	121	121	1	121	121	1	121	121	1	121	2.08636	0.30103	2.08636
G zebra	2	2	ST	27	6	1.44716	0.845098	0	0	0	0	0	0	0	0	0	0	0	0	0	0	0	0	0	0	0	0	0	0	0	0	0	0	0	0	0	0	0	0	0	0	0	0	0	0	0	0	0	0
G zebra	2	3	AMF	27	5	1.44716	0.778151	0	0	0	0	0	0	0	0	0	0	0	0	0	0	0	0	0	0	0	0	0	0	0	0	0	0	0	0	0	0	0	0	0	0	0	0	0	0	0	0	0	0
G zebra	2	3	AMF	32	9	1.51851	1	50	1	50	50	1	50	0	0	0	0	0	0	0	0	0	0	0	0	0	0	0	0	0	0	50	1	50	50	1	50	50	1	50	50	1	50	50	1	50	1.70757	0.30103	1.70757
G zebra	2	3	AMF	31	5	1.50515	0.778151	197	2	98.5	197	2	98.5	0	0	0	0	0	0	0	0	0	0	0	0	0	0	0	0	0	0	197	2	98.5	197	2	98.5	197	2	98.5	197	2	98.5	197	2	98.5	2.29667	0.477121	1.99782
G zebra	2	3	AMF	36	8	1.5682	0.954243	0	0	0	0	0	0	0	0	0	0	0	0	0	0	0	0	0	0	0	0	0	0	0	0	0	0	0	0	0	0	0	0	0	0	0	0	0	0	0	0	0	0
G zebra	2	3	ST	26	7	1.43136	0.90309	0	0	0	0	0	0	0	0	0	0	0	0	0	0	0	0	0	0	0	0	0	0	0	0	0	0	0	0	0	0	0	0	0	0	0	0	0	0	0	0	0	0
G zebra	2	3	ST	28	6	1.4624	0.845098	66	1	66	66	1	66	0	0	0	0	0	0	0	0	0	0	0	0	0	0	0	0	0	0	66	1	66	66	1	66	66	1	66	66	1	66	66	1	66	1.82607	0.30103	1.82607
G zebra	2	3	ST	31	6	1.50515	0.845098	0	0	0	0	0	0	0	0	0	0	0	0	0	0	0	0	0	0	0	0	0	0	0	0	0	0	0	0	0	0	0	0	0	0	0	0	0	0	0	0	0	0
G zebra	2	3	ST	30	7	1.49136	0.90309	204	2	102	204	2	102	0	0	0	0	0	0	0	0	0	0	0	0	0	0	0	0	0	0	204	2	102	204	2	102	204	2	102	204	2	102	204	2	102	2.31175	0.477121	2.01284
G zeb	2	3	AMF	30	6	1.49136	0.845098	0	0	0	0	0	0	0	0	0	0	0	0	0	0	0	0	0	0	0	0	0	0	0	0	0	0	0	0	0	0	0	0	0	0	0	0	0	0	0	0	0	0
G zeb	2	3	AMF	37	7	1.57978	0.90309	0	0	0	0	0	0	0	0	0	0	0	0	0	0	0	0	0	0	0	0	0	0	0	0	0	0	0	0	0	0	0	0	0	0	0	0	0	0	0	0	0	0
G zeb	2	3	AMF	25	4	1.41497	0.69897	124	1	124	124	1	124	0	0	0	0	0	0	0	0	0	0	0	0	0	0	0	0	0	0	124	1	124	124	1	124	124	1	124	124	1	124	124	1	124	2.09691	0.30103	2.09691
St. Germane	2	4	AMF	20	6	1.32222	0.845098	894	4	223.5	0	0	0	431	2	215.5	0	0	0	235	1	235	228	1	228	0	0	0	0	0	0	431	2	215.5	431	2	215.5	666	3	222	894	4	223.5	894	4	223.5	2.63548	0.477121	2.33546
St. Germane	2	4	AMF	17	5	1.25527	0.778151	2462	10	246.2	574	1	574	0	0	0	671	2	335.5	344	2	172	745	4	186.25	128	1	128	0	0	0	574	1	574	1245	3	415	1589	5	317.8	2334	9	259.333	2462	10	246.2	2.75967	0.30103	2.75967
St. Germane	2	4	AMF	28	8	1.4624	0.954243	1500	7	214.286	297	1	297	266	1	266	0	0	0	0	0	0	937	5	187.4	0	0	0	0	0	0	563	2	281.5	563	2	281.5	563	2	281.5	1500	7	214.286	1500	7	214.286	2.75128	0.477121	2.45102
St. Germane	2	4	AMF	33	7	1.53148	0.90309	2231	9	247.889	886	2	443	0	0	0	730	1	730	0	0	0	615	6	102.5	0	0	0	0	0	0	886	2	443	1616	3	538.667	1616	3	538.667	2231	9	247.889	2231	9	247.889	2.94792	0.477121	2.64738
St. Germane	2	4	ST	22	7	1.36173	0.90309	1243	3	414.333	0	0	0	946	2	473	0	0	0	297	1	297	0	0	0	0	0	0	0	0	0	946	2	473	946	2	473	1243	3	414.333	1243	3	414.333	1243	3	414.333	2.97635	0.477121	2.67578
St. Germane	2	4	ST	31	5	1.50515	0.778151	1515	6	252.5	1115	2	557.5	0	0	0	0	0	0	0	0	0	258	3	86	142	1	142	0	0	0	1115	2	557.5	1115	2	557.5	1115	2	557.5	1373	5	274.6	1515	6	252.5	3.04766	0.477121	2.74702
St. Germane	2	4	ST	25	6	1.41497	0.845098	253	1	253	0	0	0	0	0	0	253	1	253	0	0	0	0	0	0	0	0	0	0	0	0	0	0	0	253	1	253	253	1	253	253	1	253	253	1	253	0	0	0
St. Germane	2	4	ST	28	6	1.4624	0.845098	1340	5	268	0	0	0	532	1	532	0	0	0	455	2	227.5	353	2	176.5	0	0	0	0	0	0	532	1	532	532	1	532	987	3	329	1340	5	268	1340	5	268	2.72673	0.30103	2.72673
St. Germane	3	1	AMF	36	5	1.5682	0.778151	1028	3	342.667	0	0	0	432	1	432	398	1	398	0	0	0	198	1	198	0	0	0	0	0	0	432	1	432	830	2	415	830	2	415	1028	3	342.667	1028	3	342.667	2.63649	0.30103	2.63649
St. Germane	3	1	AMF	35	5	1.5563	0.778151	1268	3	422.667	729	1	729	0	0	0	340	1	340	199	1	199	0	0	0	0	0	0	0	0	0	729	1	729	1069	2	534.5	1268	3	422.667	1268	3	422.667	1268	3	422.667	2.86332	0.30103	2.86332
St. Germane	3	1	AMF	35	5	1.5563	0.778151	1224	3	408	776	1	776	0	0	0	0	0	0	240	1	240	208	1	208	0	0	0	0	0	0	776	1	776	776	1	776	1016	2	508	1224	3	408	1224	3	408	2.89042	0.30103	2.89042
St. Germane	3	1	AMF	38	5	1.59106	0.778151	1285	2	642.5	0	0	0	799	1	799	486	1	486	0	0	0	0	0	0	0	0	0	0	0	0	799	1	799	1285	2	642.5	1285	2	642.5	1285	2	642.5	1285	2	642.5	2.90309	0.30103	2.90309
St. Germane	3	1	ST	40	4	1.61278	0.69897	1136	3	378.667	0	0	0	823	1	823	0	0	0	313	2	156.5	0	0	0	0	0	0	0	0	0	823	1	823	823	1	823	1136	3	378.667	1136	3	378.667	1136	3	378.667	2.91593	0.30103	2.91593
St. Germane	3	1	ST	42	3	1.63347	0.60206	1882	5	376.4	0	0	0	1476	3	492	0	0	0	0	0	0	193	1	193	213	1	213	0	0	0	1476	3	492	1476	3	492	1476	3	492	1669	4	417.25	1882	5	376.4	3.16938	0.60206	2.69285
St. Germane	3	1	ST	41	4	1.62325	0.69897	2316	5	463.2	581	1	581	1271	3	423.667	464	1	464	0	0	0	0	0	0	0	0	0	0	0	0	1852	4	463	2316	5	463.2	2316	5	463.2	2316	5	463.2	2316	5	463.2	3.26788	0.69897	2.66652
St. Germane	3	1	ST	38	4	1.59106	0.69897	1608	10	160.8	0	0	0	0	0	0	0	0	0	776	4	194	534	5	106.8	298	1	298	0	0	0	0	0	0	0	0	0	776	4	194	1310	9	145.556	1608	10	160.8	0	0	0
Valencia	3	2	AMF	38	7	1.59106	0.90309	0	0	0	0	0	0	0	0	0	0	0	0	0	0	0	0	0	0	0	0	0	0	0	0	0	0	0	0	0	0	0	0	0	0	0	0	0	0	0	0	0	0
Valencia	3	2	AMF	39	7	1.60206	0.90309	0	0	0	0	0	0	0	0	0	0	0	0	0	0	0	0	0	0	0	0	0	0	0	0	0	0	0	0	0	0	0	0	0	0	0	0	0	0	0	0	0	0
Valencia	3	2	AMF	34	5	1.54407	0.778151	0	0	0	0	0	0	0	0	0	0	0	0	0	0	0	0	0	0	0	0	0	0	0	0	0	0	0	0	0	0	0	0	0	0	0	0	0	0	0	0	0	0
Valencia	3	2	AMF	31	7	1.50515	0.90309	0	0	0	0	0	0	0	0	0	0	0	0	0	0	0	0	0	0	0	0	0	0	0	0	0	0	0	0	0	0	0	0	0	0	0	0	0	0	0	0	0	0
Valencia	3	2	ST	31	7	1.50515	0.90309	0	0	0	0	0	0	0	0	0	0	0	0	0	0	0	0	0	0	0	0	0	0	0	0	0	0	0	0	0	0	0	0	0	0	0	0	0	0	0	0	0	0
Valencia	3	2	ST	39	7	1.60206	0.90309	0	0	0	0	0	0	0	0	0	0	0	0	0	0	0	0	0	0	0	0	0	0	0	0	0	0	0	0	0	0	0	0	0	0	0	0	0	0	0	0	0	0
Valencia	3	2	ST	44	6	1.65321	0.845098	0	0	0	0	0	0	0	0	0	0	0	0	0	0	0	0	0	0	0	0	0	0	0	0	0	0	0	0	0	0	0	0	0	0	0	0	0	0	0	0	0	0
Valencia	3	2	ST	40	6	1.61278	0.845098	0	0	0	0	0	0	0	0	0	0	0	0	0	0	0	0	0	0	0	0	0	0	0	0	0	0	0	0	0	0	0	0	0	0	0	0	0	0	0	0	0	0
Valencia	3	3	AMF	25	6	1.41497	0.845098	257	1	257	257	1	257	0	0	0	0	0	0	0	0	0	0	0	0	0	0	0	0	0	0	257	1	257	257	1	257	257	1	257	257	1	257	257	1	257	2.41162	0.30103	2.41162
Valencia	3	3	AMF	23	5	1.38021	0.778151	455	3	151.667	455	3	151.667	0	0	0	0	0	0	0	0	0	0	0	0	0	0	0	0	0	0	455	3	151.667	455	3	151.667	455	3	151.667	455	3	151.667	455	3	151.667	2.65896	0.60206	2.18374
Valencia	3	3	AMF	24	5	1.39794	0.778151	0	0	0	0	0	0	0	0	0	0	0	0	0	0	0	0	0	0	0	0	0	0	0	0	0	0	0	0	0	0	0	0	0	0	0	0	0	0	0	0	0	0
Valencia	3	3	AMF	29	6	1.47712	0.845098	134	1	134	134	1	134	0	0	0	0	0	0	0	0	0	0	0	0	0	0	0	0	0	0	134	1	134	134	1	134	134	1	134	134	1	134	134	1	134	2.13033	0.30103	2.13033
Valencia	3	3	ST	21	5	1.34242	0.778151	0	0	0	0	0	0	0	0	0	0	0	0	0	0	0	0	0	0	0	0	0	0	0	0	0	0	0	0	0	0	0	0	0	0	0	0	0	0	0	0	0	0
Valencia	3	3	ST	31	6	1.50515	0.845098	620	4	155	620	4	155	0	0	0	0	0	0	0	0	0	0	0	0	0	0	0	0	0	0	620	4	155	620	4	155	620	4	155	620	4	155	620	4	155	2.79309	0.69897	2.19312
Valencia	3	3	ST	29	8	1.47712	0.954243	0	0	0	0	0	0	0	0	0	0	0	0	0	0	0	0	0	0	0	0	0	0	0	0	0	0	0	0	0	0	0	0	0	0	0	0	0	0	0	0	0	0
Valencia	3	3	ST	27	8	1.44716	0.954243	0	0	0	0	0	0	0	0	0	0	0	0	0	0	0	0	0	0	0	0	0	0	0	0	0	0	0	0	0	0	0	0	0	0	0	0	0	0	0	0	0	0
Valencia	3	4	AMF	33	6	1.53148	0.845098	258	1	258	258	1	258	0	0	0	0	0	0	0	0	0	0	0	0	0	0	0	0	0	0	258	1	258	258	1	258	258	1	258	258	1	258	258	1	258	2.4133	0.30103	2.4133
Valencia	3	4	AMF	32	5	1.51851	0.778151	487	3	162.333	487	3	162.333	0	0	0	0	0	0	0	0	0	0	0	0	0	0	0	0	0	0	487	3	162.333	487	3	162.333	487	3	162.333	487	3	162.333	487	3	162.333	2.68842	0.60206	2.21307
Valencia	3	4	AMF	32	6	1.51851	0.845098	401	5	80.2	401	5	80.2	0	0	0	0	0	0	0	0	0	0	0	0	0	0	0	0	0	0	401	5	80.2	401	5	80.2	401	5	80.2	401	5	80.2	401	5	80.2	2.60423	0.778151	1.90956
Valencia	3	4	AMF	36	5	1.5682	0.778151	240	2	120	240	2	120	0	0	0	0	0	0	0	0	0	0	0	0	0	0	0	0	0	0	240	2	120	240	2	120	240	2	120	240	2	120	240	2	120	2.38202	0.477121	2.08279
Valencia	3	4	ST	22	4	1.36173	0.69897	483	2	241.5	483	2	241.5	0	0	0	0	0	0	0	0	0	0	0	0	0	0	0	0	0	0	483	2	241.5	483	2	241.5	483	2	241.5	483	2	241.5	483	2	241.5	2.68485	0.477121	2.38471
Valencia	3	4	ST	35	6	1.5563	0.845098	179	1	179	179	1	179	0	0	0	0	0	0	0	0	0	0	0	0	0	0	0	0	0	0	179	1	179	179	1	179	179	1	179	179	1	179	179	1	179	2.25527	0.30103	2.25527
Valencia	3	4	ST	25	6	1.41497	0.845098	0	0	0	0	0	0	0	0	0	0	0	0	0	0	0	0	0	0	0	0	0	0	0	0	0	0	0	0	0	0	0	0	0	0	0	0	0	0	0	0	0	0
Valencia	3	4	ST	34	5	1.54407	0.778151	111	1	111	111	1	111	0	0	0	0	0	0	0	0	0	0	0	0	0	0	0	0	0	0	111	1	111	111	1	111	111	1	111	111	1	111	111	1	111	2.04922	0.30103	2.04922
Black Kirm	4	1	AMF	39	7	1.60206	0.90309	3317	11	301.545	2255	7	322.143	1062	4	265.5	0	0	0	0	0	0	0	0	0	0	0	0	0	0	0	3317	11	301.545	3317	11	301.545	3317	11	301.545	3317	11	301.545	3317	11	301.545	3.52088	1.07918	2.48079
Black Kirm	4	1	AMF	39	7	1.60206	0.90309	471	2	235.5	0	0	0	0	0	0	0	0	0	471	2	235.5	0	0	0	0	0	0	0	0	0	0	0	0	0	0	0	471	2	235.5	471	2	235.5	471	2	235.5	0	0	0
Black Kirm	4	1	AMF	42	6	1.63347	0.845098	3487	14	249.071	2337	9	259.667	810	3	270	0	0	0	0	0	0	0	0	0	188	1	188	152	1	152	3147	12	262.25	3147	12	262.25	3147	12	262.25	3147	12	262.25	3335	13	256.538	3.49803	1.11394	2.42037
Black Kirm	4	1	AMF	37	6	1.57978	0.845098	4064	14	290.286	2210	7	315.714	1488	5	297.6	271	1	271	0	0	0	0	0	0	95	1	95	0	0	0	3698	12	308.167	3969	13	305.308	3969	13	305.308	3969	13	305.308	4064	14	290.286	3.56808	1.11394	2.49019
Black Kirm	4	1	ST	21	6	1.34242	0.845098	2152	11	195.636	1475	5	295	0	0	0	0	0	0	328	2	164	349	4	87.25	0	0	0	0	0	0	1475	5	295	1475	5	295	1803	7	257.571	2152	11	195.636	2152	11	195.636	3.16909	0.778151	2.47129
Black Kirm	4	1	ST	22	6	1.36173	0.845098	3699	13	284.538	2540	7	362.857	855	3	285	0	0	0	221	2	110.5	0	0	0	0	0	0	83	1	83	3395	10	339.5	3395	10	339.5	3616	12	301.333	3616	12	301.333	3616	12	301.333	3.53097	1.04139	2.53212
Black Kirm	4	1	ST	31	7	1.50515	0.90309	1885	9	209.444	313	1	313	681	2	340.5	445	2	222.5	0	0	0	105	1	105	230	2	115	111	1	111	994	3	331.333	1439	5	287.8	1439	5	287.8	1544	6	257.333	1774	8	221.75	2.99782	0.60206	2.52157
Black Kirm	4	1	ST	34	7	1.54407	0.90309	1087	5	217.4	0	0	0	816	2	408	0	0	0	0	0	0	271	3	90.3333	0	0	0	0	0	0	816	2	408	816	2	408	816	2	408	1087	5	217.4	1087	5	217.4	2.91222	0.477121	2.61172
Black Kirm	4	2	AMF	40	7	1.61278	0.90309	2109	8	263.625	692	2	346	788	2	394	0	0	0	193	1	193	436	3	145.333	0	0	0	0	0	0	1480	4	370	1480	4	370	1673	5	334.6	2109	8	263.625	2109	8	263.625	3.17056	0.69897	2.56937
Black Kirm	4	2	AMF	34	7	1.54407	0.90309	3429	16	214.312	1833	7	261.857	994	4	248.5	0	0	0	0	0	0	467	4	116.75	135	1	135	0	0	0	2827	11	257	2827	11	257	2827	11	257	3294	15	219.6	3429	16	214.312	3.45148	1.07918	2.41162
Black Kirm	4	2	AMF	34	7	1.54407	0.90309	2687	9	298.556	2130	6	355	262	1	262	0	0	0	0	0	0	295	2	147.5	0	0	0	0	0	0	2392	7	341.714	2392	7	341.714	2392	7	341.714	2687	9	298.556	2687	9	298.556	3.37894	0.90309	2.53493
Black Kirm	4	2	AMF	37	7	1.57978	0.90309	2440	9	271.111	2044	6	340.667	0	0	0	0	0	0	193	1	193	148	1	148	0	0	0	55	1	55	2044	6	340.667	2044	6	340.667	2237	7	319.571	2385	8	298.125	2385	8	298.125	3.31069	0.845098	2.5336
Black Kirm	4	2	ST	37	4	1.57978	0.69897	1058	5	211.6	0	0	0	819	2	409.5	0	0	0	122	1	122	117	2	58.5	0	0	0	0	0	0	819	2	409.5	819	2	409.5	941	3	313.667	1058	5	211.6	1058	5	211.6	2.91381	0.477121	2.61331
Black Kirm	4	2	ST	37	7	1.57978	0.90309	3007	10	300.7	1139	3	379.667	927	2	463.5	165	1	165	0	0	0	636	3	212	140	1	140	0	0	0	2066	5	413.2	2231	6	371.833	2231	6	371.833	2867	9	318.556	3007	10	300.7	3.31534	0.778151	2.61721
Black Kirm	4	2	ST	41	6	1.62325	0.845098	2141	7	305.857	1581	4	395.25	0	0	0	437	2	218.5	0	0	0	0	0	0	123	1	123	0	0	0	1581	4	395.25	2018	6	336.333	2018	6	336.333	2018	6	336.333	2141	7	305.857	3.19921	0.69897	2.59797
Black Kirm	4	2	ST	41	7	1.62325	0.90309	931	4	232.75	376	1	376	0	0	0	0	0	0	340	2	170	215	1	215	0	0	0	0	0	0	376	1	376	376	1	376	716	3	238.667	931	4	232.75	931	4	232.75	2.57634	0.30103	2.57634
Black Kirm	4	3	AMF	41	7	1.62325	0.90309	4102	24	170.917	2246	9	249.556	0	0	0	0	0	0	246	2	123	1311	10	131.1	299	3	99.6667	0	0	0	2246	9	249.556	2246	9	249.556	2492	11	226.545	3803	21	181.095	4102	24	170.917	3.3516	1	2.3989
Black Kirm	4	3	AMF	40	8	1.61278	0.954243	3088	15	205.867	2081	8	260.125	0	0	0	175	1	175	385	2	192.5	141	1	141	306	3	102	0	0	0	2081	8	260.125	2256	9	250.667	2641	11	240.091	2782	12	231.833	3088	15	205.867	3.31848	0.954243	2.41685
Black Kirm	4	3	AMF	44	7	1.65321	0.90309	2183	11	198.455	1272	5	254.4	338	1	338	207	3	69	161	1	161	205	1	205	0	0	0	0	0	0	1610	6	268.333	1817	9	201.889	1978	10	197.8	2183	11	198.455	2183	11	198.455	3.2071	0.845098	2.43029
Black Kirm	4	3	AMF	42	7	1.63347	0.90309	2132	8	266.5	1602	5	320.4	320	1	320	0	0	0	0	0	0	115	1	115	95	1	95	0	0	0	1922	6	320.333	1922	6	320.333	1922	6	320.333	2037	7	291	2132	8	266.5	3.28398	0.845098	2.50696
Black Kirm	4	3	ST	41	8	1.62325	0.954243	575	3	191.667	0	0	0	0	0	0	0	0	0	143	1	143	432	2	216	0	0	0	0	0	0	0	0	0	0	0	0	143	1	143	575	3	191.667	575	3	191.667	0	0	0
Black Kirm	4	3	ST	20	7	1.32222	0.90309	1396	5	279.2	831	2	415.5	343	1	343	94	1	94	128	1	128	0	0	0	0	0	0	0	0	0	1174	3	391.333	1268	4	317	1396	5	279.2	1396	5	279.2	1396	5	279.2	3.07004	0.60206	2.59366
Black Kirm	4	3	ST	41	8	1.62325	0.954243	1688	6	281.333	1107	3	369	320	1	320	154	1	154	0	0	0	107	1	107	0	0	0	0	0	0	1427	4	356.75	1581	5	316.2	1581	5	316.2	1688	6	281.333	1688	6	281.333	3.15473	0.69897	2.55358
Black Kirm	4	3	ST	40	7	1.61278	0.90309	1848	8	231	997	3	332.333	197	1	197	0	0	0	0	0	0	163	1	163	314	2	157	177	1	177	1194	4	298.5	1194	4	298.5	1194	4	298.5	1357	5	271.4	1671	7	238.714	3.07737	0.69897	2.4764
Black Kirm	4	4	AMF	39	6	1.60206	0.845098	999	4	249.75	702	2	351	0	0	0	0	0	0	0	0	0	179	1	179	118	1	118	0	0	0	702	2	351	702	2	351	702	2	351	881	3	293.667	999	4	249.75	2.84696	0.477121	2.54654
Black Kirm	4	4	AMF	41	8	1.62325	0.954243	1528	8	191	1096	5	219.2	0	0	0	0	0	0	156	1	156	170	1	170	106	1	106	0	0	0	1096	5	219.2	1096	5	219.2	1252	6	208.667	1422	7	203.143	1528	8	191	3.04021	0.778151	2.34282
Black Kirm	4	4	AMF	43	6	1.64345	0.845098	1759	8	219.875	1376	5	275.2	0	0	0	0	0	0	154	1	154	229	2	114.5	0	0	0	0	0	0	1376	5	275.2	1376	5	275.2	1530	6	255	1759	8	219.875	1759	8	219.875	3.13893	0.778151	2.44122
Black Kirm	4	4	AMF	40	7	1.61278	0.90309	2723	18	151.278	732	3	244	0	0	0	0	0	0	0	0	0	1736	13	133.538	255	2	127.5	0	0	0	732	3	244	732	3	244	732	3	244	2468	16	154.25	2723	18	151.278	2.8651	0.60206	2.38917
Black Kirm	4	4	ST	40	7	1.61278	0.90309	1310	7	187.143	937	4	234.25	0	0	0	0	0	0	163	1	163	127	1	127	83	1	83	0	0	0	937	4	234.25	937	4	234.25	1100	5	220	1227	6	204.5	1310	7	187.143	2.9722	0.69897	2.37153
Black Kirm	4	4	ST	44	8	1.65321	0.954243	747	4	186.75	0	0	0	173	1	173	342	2	171	232	1	232	0	0	0	0	0	0	0	0	0	173	1	173	515	3	171.667	747	4	186.75	747	4	186.75	747	4	186.75	2.24055	0.30103	2.24055
Black Kirm	4	4	ST	46	8	1.6721	0.954243	1056	3	352	1056	3	352	0	0	0	0	0	0	0	0	0	0	0	0	0	0	0	0	0	0	1056	3	352	1056	3	352	1056	3	352	1056	3	352	1056	3	352	3.02407	0.60206	2.54777
Black Kirm	4	4	ST	38	7	1.59106	0.90309	2387	8	298.375	1646	4	411.5	520	2	260	0	0	0	0	0	0	159	1	159	62	1	62	0	0	0	2166	6	361	2166	6	361	2166	6	361	2325	7	332.143	2387	8	298.375	3.33586	0.845098	2.55871
[truncated: 36 more columns]

## Sheet: Pepper Data Sheet
Row	Block	Treat	Variety	Type	Soil	inht	inlf	loginht	loginlf	h0	h1	h2	h3	h4	h5	h6	h7	h8	h9	h10	h11	h12	TotalHarvestNumber	TOTALFINAL	logtotalfinal	h01	h02	h03	h04	h05	h06	h07	h08	h09	h010	h011	h012	log0	log01	log02	log03	log04	log05	log06	log07	log08	log09	log010	log011
1	1	AMF	JEDI	Jal	AMF	10.6667	8.83333	1.06695	0.992701	260	635	38	1600			1250					1200	3450	7	8433	3.92603	895	933	2533	2533	2533	3783	3783	3783	3783	3783	4983	8433	2.41664	2.95231	2.97035	3.40381	3.40381	3.40381	3.57795	3.57795	3.57795	3.57795	3.57795	3.69758
1	1	ST	JEDI	Jal	ST	8.70833	7.83333	0.987145	0.946125	402	1599	66	1050			1000					1100	6150	7	11367	4.05568	2001	2067	3117	3117	3117	4117	4117	4117	4117	4117	5217	11367	2.60531	3.30146	3.31555	3.49388	3.49388	3.49388	3.61469	3.61469	3.61469	3.61469	3.61469	3.7175
1	2	AMF	JEDI	Jal	AMF	5.375	6.75	0.80448	0.889302	154	1585	54	2900			1250					1150	7650	7	14743	4.16862	1739	1793	4693	4693	4693	5943	5943	5943	5943	5943	7093	14743	2.19033	3.24055	3.25382	3.67154	3.67154	3.67154	3.77408	3.77408	3.77408	3.77408	3.77408	3.85089
1	2	ST	JEDI	Jal	ST	5.625	6.5	0.821186	0.875061	245	2016	60	3500			1450					1300	7950	7	16521	4.21806	2261	2321	5821	5821	5821	7271	7271	7271	7271	7271	8571	16521	2.39094	3.35449	3.36586	3.76507	3.76507	3.76507	3.86165	3.86165	3.86165	3.86165	3.86165	3.93308
1	3	AMF	JEDI	Jal	AMF	6.08333	7.08333	0.850238	0.90759	304	2406	65	2800									11450	5	17025	4.23111	2710	2775	5575	5575	5575	5575	5575	5575	5575	5575	5575	17025	2.4843	3.43313	3.44342	3.74632	3.74632	3.74632	3.74632	3.74632	3.74632	3.74632	3.74632	3.74632
1	3	ST	JEDI	Jal	ST	7.125	7.33333	0.909823	0.920819	280	1667	52	2850									8750	5	13599	4.13354	1947	1999	4849	4849	4849	4849	4849	4849	4849	4849	4849	13599	2.44871	3.28959	3.30103	3.68574	3.68574	3.68574	3.68574	3.68574	3.68574	3.68574	3.68574	3.68574
1	4	AMF	JEDI	Jal	AMF	7.5	7.5	0.929419	0.929419	365	1529	52	2150					6550	1400				6	12046	4.08088	1894	1946	4096	4096	4096	4096	4096	10646	12046	12046	12046	12046	2.56348	3.27761	3.28937	3.61247	3.61247	3.61247	3.61247	3.61247	4.02723	4.08088	4.08088	4.08088
1	4	ST	JEDI	Jal	ST	9.79167	7.91667	1.03309	0.950203	211	948	50	1700					3250	900				6	7059	3.8488	1159	1209	2909	2909	2909	2909	2909	6159	7059	7059	7059	7059	2.32634	3.06446	3.08279	3.46389	3.46389	3.46389	3.46389	3.46389	3.78958	3.8488	3.8488	3.8488
2	1	AMF	Mam	Jal	AMF	12.1667	11.8333	1.11948	1.10834	660	1554	49	2400			1800			750				6	7213	3.85818	2214	2263	4663	4663	4663	6463	6463	6463	7213	7213	7213	7213	2.8202	3.34537	3.35488	3.66876	3.66876	3.66876	3.8105	3.8105	3.8105	3.85818	3.85818	3.85818
2	1	ST	Mam	Jal	ST	10.875	10.9167	1.07463	1.07615	392	4358	63	2600			1200			750				6	9363	3.97146	4750	4813	7413	7413	7413	8613	8613	8613	9363	9363	9363	9363	2.59439	3.67679	3.68251	3.87005	3.87005	3.87005	3.9352	3.9352	3.9352	3.97146	3.97146	3.97146
2	2	AMF	Mam	Jal	AMF	9.83333	8.91667	1.03476	0.996366	351	3657	41	3600			1100		12550			2700		7	23999	4.38021	4008	4049	7649	7649	7649	8749	8749	21299	21299	21299	23999	23999	2.54654	3.60304	3.60746	3.88366	3.88366	3.88366	3.94201	3.94201	4.32838	4.32838	4.32838	4.38021
2	2	ST	Mam	Jal	ST	8.95833	9	0.998187	1	238	3869	58	3050			1100		10650			1250		7	20215	4.3057	4107	4165	7215	7215	7215	8315	8315	18965	18965	18965	20215	20215	2.3784	3.61363	3.61972	3.8583	3.8583	3.8583	3.91991	3.91991	4.27798	4.27798	4.27798	4.3057
2	3	AMF	Mam	Jal	AMF	8.5	8.91667	0.977724	0.996366	391	5733	56	3000					15950			3450		6	28580	4.45608	6124	6180	9180	9180	9180	9180	9180	25130	25130	25130	28580	28580	2.59329	3.78711	3.79106	3.96289	3.96289	3.96289	3.96289	3.96289	4.40021	4.40021	4.40021	4.45608
2	3	ST	Mam	Jal	ST	9.25	10.6667	1.01072	1.06695	433	4639	45	2850					13200			3250		6	24417	4.38771	5072	5117	7967	7967	7967	7967	7967	21167	21167	21167	24417	24417	2.63749	3.70526	3.7091	3.90135	3.90135	3.90135	3.90135	3.90135	4.32568	4.32568	4.32568	4.38771
2	4	AMF	Mam	Jal	AMF	8.08333	9.83333	0.958245	1.03476	276	3750	45	3750						2500			8100	6	18421	4.26534	4026	4071	7821	7821	7821	7821	7821	7821	10321	10321	10321	18421	2.44248	3.60498	3.60981	3.89332	3.89332	3.89332	3.89332	3.89332	3.89332	4.01376	4.01376	4.01376
2	4	ST	Mam	Jal	ST	10.9583	10.5	1.07767	1.0607	355	3972	47	2950						1450			7100	6	15874	4.20071	4327	4374	7324	7324	7324	7324	7324	7324	8774	8774	8774	15874	2.55145	3.63629	3.64098	3.86481	3.86481	3.86481	3.86481	3.86481	3.86481	3.94325	3.94325	3.94325
3	1	AMF	Isl-pur	bell	AMF	4.08333	6.66667	0.706149	0.884607	731	2900	135	3800		300	1550	2850	50	1450		3850		10	17616	4.24593	3631	3766	7566	7566	7866	9416	12266	12316	13766	13766	17616	17616	2.86451	3.56015	3.576	3.87892	3.87892	3.89581	3.97391	4.08874	4.0905	4.13884	4.13884	4.24593
3	1	ST	Isl-pur	bell	ST	5.86364	9.27273	0.836554	1.01169	477	1050	134	4000		650	1900	2300	0	1100		2300		9	13911	4.14339	1527	1661	5661	5661	6311	8211	10511	10511	11611	11611	13911	13911	2.67943	3.18412	3.22063	3.75297	3.75297	3.80017	3.91445	4.02169	4.02169	4.06491	4.06491	4.14339
3	2	AMF	Isl-pur	bell	AMF	5.25	8.83333	0.79588	0.992701	715	3200	77	4250		1350	2000	2950	150			1350		9	16042	4.20529	3915	3992	8242	8242	9592	11592	14542	14692	14692	14692	16042	16042	2.85491	3.59284	3.6013	3.91609	3.91609	3.98195	4.0642	4.16265	4.16711	4.16711	4.16711	4.20529
3	2	ST	Isl-pur	bell	ST	7.04167	7.75	0.905346	0.942008	659	2200	106	3500		1100	4250	3250	0			2050		8	17115	4.2334	2859	2965	6465	6465	7565	11815	15065	15065	15065	15065	17115	17115	2.81954	3.45637	3.47217	3.81064	3.81064	3.87887	4.07247	4.178	4.178	4.178	4.178	4.2334
3	3	AMF	Isl-pur	bell	AMF	5.25	8.83333	0.79588	0.992701	1501	1750	113	1550		1700	5606	2550				2900		8	17670	4.24726	3251	3364	4914	4914	6614	12220	14770	14770	14770	14770	17670	17670	3.17667	3.51215	3.52699	3.69152	3.69152	3.82053	4.08711	4.16941	4.16941	4.16941	4.16941	4.24726
3	3	ST	Isl-pur	bell	ST	4.91667	7.33333	0.772077	0.920819	707	2000	187	3450		1800	3300	3450				2250		8	17144	4.23414	2707	2894	6344	6344	8144	11444	14894	14894	14894	14894	17144	17144	2.85003	3.43265	3.46165	3.80243	3.80243	3.91089	4.05862	4.17304	4.17304	4.17304	4.17304	4.23414
3	4	AMF	Isl-pur	bell	AMF	5.58333	8.91667	0.818446	0.996366	921	600	53	1050		1750	5800	4400		1750		1400		9	17724	4.24859	1521	1574	2624	2624	4374	10174	14574	14574	16324	16324	17724	17724	2.96473	3.18241	3.19728	3.41913	3.41913	3.64098	4.00753	4.16361	4.16361	4.21285	4.21285	4.24859
3	4	ST	Isl-pur	bell	ST	5.91667	8.41667	0.839897	0.973897	414	2000	85	1450		850	3800	4750		1650		350		9	15349	4.18611	2414	2499	3949	3949	4799	8599	13349	13349	14999	14999	15349	15349	2.61805	3.38292	3.39794	3.5966	3.5966	3.68124	3.9345	4.12548	4.12548	4.17609	4.17609	4.18611
4	1	AMF	Milena	bell	AMF	10.8333	7.75	1.07311	0.942008				950		3600	600	700	1000	1450	1300	3100	1250	9	13950	4.14461			950	950	4550	5150	5850	6850	8300	9600	12700	13950				2.97818	2.97818	3.65811	3.71189	3.76723	3.83575	3.91913	3.98232	4.10384
4	1	ST	Milena	bell	ST	9.20833	7.66667	1.00895	0.937852				700		5450	1250	650	100	350	550	1750	500	9	11300	4.05312			700	700	6150	7400	8050	8150	8500	9050	10800	11300				2.84572	2.84572	3.78895	3.86929	3.90585	3.91121	3.92947	3.9567	4.03346
4	2	AMF	Milena	bell	AMF	7.33333	6.91667	0.920819	0.898542				1100		5300	2950	500	50	0	100	3750	500	8	14250	4.15385			1100	1100	6400	9350	9850	9900	9900	10000	13750	14250				3.04179	3.04179	3.80625	3.97086	3.99348	3.99568	3.99568	4.00004	4.13833
4	2	ST	Milena	bell	ST	9.66667	7.16667	1.02803	0.912045				350		3750	4500	1000	0	0	0	2600	650	6	12850	4.10894			350	350	4100	8600	9600	9600	9600	9600	12200	12850				2.54531	2.54531	3.61289	3.93455	3.98232	3.98232	3.98232	3.98232	4.0864
4	3	AMF	Milena	bell	AMF	12.6667	7.91667	1.13566	0.950203				2500		2300	1400	105	50	0	1250	5200	1100	8	13905	4.1432			2500	2500	4800	6200	6305	6355	6355	7605	12805	13905				3.39811	3.39811	3.68133	3.79246	3.79975	3.80318	3.80318	3.88116	4.10741
4	3	ST	Milena	bell	ST	7.375	7.91667	0.922985	0.950203														0
4	4	AMF	Milena	bell	AMF	8.08333	7.66667	0.958245	0.937852				1400		200	2000	500	550	200		2800	850	8	8500	3.92947			1400	1400	1600	3600	4100	4650	4850	4850	7650	8500				3.14644	3.14644	3.20439	3.55642	3.61289	3.66755	3.68583	3.68583	3.88372
4	4	ST	Milena	bell	ST	7.16667	7.66667	0.912045	0.937852				800		5050	1550	100	300	150		2000	50	8	10000	4.00004			800	800	5850	7400	7500	7800	7950	7950	9950	10000				2.90363	2.90363	3.76723	3.86929	3.87512	3.89215	3.90042	3.90042	3.99787
5	1	AMF	Shishito	shis	AMF	3.41667	7.25	0.645095	0.916454	467	2650	44	950	716	400				2800				7	8027	3.90461	3117	3161	4111	4827	5227	5227	5227	5227	8027	8027	8027	8027	2.67025	3.49388	3.49996	3.61405	3.68377	3.71834	3.71834	3.71834	3.71834	3.90461	3.90461	3.90461
5	1	ST	Shishito	shis	ST	4.83333	9.5	0.765917	1.02119	651	2400	79	1000	898	750				2000				7	7778	3.89092	3051	3130	4130	5028	5778	5778	5778	5778	7778	7778	7778	7778	2.81425	3.48458	3.49568	3.61606	3.70148	3.76185	3.76185	3.76185	3.76185	3.89092	3.89092	3.89092
5	2	AMF	Shishito	shis	AMF	3	7.08333	0.60206	0.90759	368	2900	49	450	712	600				3850				7	8929	3.95085	3268	3317	3767	4479	5079	5079	5079	5079	8929	8929	8929	8929	2.56703	3.51441	3.52088	3.57611	3.65128	3.70586	3.70586	3.70586	3.70586	3.95085	3.95085	3.95085
5	2	ST	Shishito	shis	ST	10.0417	10.75	1.04303	1.07004	301	3000	86	400	1033	500				3200				7	8520	3.93049	3301	3387	3787	4820	5320	5320	5320	5320	8520	8520	8520	8520	2.48001	3.51878	3.52994	3.57841	3.68314	3.72599	3.72599	3.72599	3.72599	3.93049	3.93049	3.93049
5	3	AMF	Shishito	shis	AMF	9.08333	8.5	1.0036	0.977724	736	3600	92	250	886	650						4750		7	10964	4.04001	4336	4428	4678	5564	6214	6214	6214	6214	6214	6214	10964	10964	2.86747	3.63719	3.64631	3.67015	3.74547	3.79344	3.79344	3.79344	3.79344	3.79344	3.79344	4.04001
5	3	ST	Shishito	shis	ST	5.86364	10.4545	0.836554	1.05898	487	4900	76	2750	935	300						4500		7	13948	4.14454	5387	5463	8213	9148	9448	9448	9448	9448	9448	9448	13948	13948	2.68842	3.73143	3.73751	3.91455	3.96137	3.97539	3.97539	3.97539	3.97539	3.97539	3.97539	4.14454
[truncated: 1 more columns]

## Sheet: Pepper Code
/* Generated Code (IMPORT) */
/* Source File: pepper block weight hoophouse for SAS8.xlsx */
/* Source Path: /home/u49292986/NSF PFI projects/Pepper hoop house 2020/pepper2023 */
/* Code generated on: 6/8/23, 2:12 PM */
%web_drop_table(WORK.IMPORT);
FILENAME REFFILE '/home/u49292986/NSF PFI projects/Pepper hoop house 2020/Final Pepper Sheets/Pepper Final Biomass.xlsx';
PROC IMPORT DATAFILE=REFFILE
DBMS=XLSX
OUT=WORK.IMPORT;
GETNAMES=YES;
RUN;
PROC CONTENTS DATA=WORK.IMPORT; RUN;
%web_open_table(WORK.IMPORT);
%web_open_table(WORK.IMPORT);
/*TOTALMINUSLast TOTALFINAL Lottotalminus logtotalfinal
proc univariate data = Work.import normal;
var TOTALMINUSLast TOTALFINAL;
run;
*/
/*loginht*loginlf*variety
log0 log01 log02 log03 log04 log05 log06 log07 log08 log09 log010 log011 log012
*/
proc mixed ; class Row Block Treat Type Variety;
model
log012
= loginht*variety loginlf*variety Treat Variety Treat*Variety ;
random Block ;
lsmeans Treat Treat*Variety ;
run;

## Sheet: Pepper Outputs
				h0									0-1									h0-2									h0-3									h0-4									h0-5
	loginht*Variety	4	11	1.72	0.2162					loginht*Variety	4	11	0.8	0.5502					loginht*Variety	4	11	0.76	0.5725					loginht*Variety	5	14	0.96	0.4736					loginht*Variety	5	14	0.75	0.5994					loginht*Variety	5	14	0.52
	loginlf*Variety	4	11	0.57	0.6895					loginlf*Variety	4	11	1.32	0.3232					loginlf*Variety	4	11	1.27	0.3393					loginlf*Variety	5	14	1.97	0.1458					loginlf*Variety	5	14	1.78	0.1819					loginlf*Variety	5	14	0.66
	Treat	1	11	0.03	0.8751					Treat	1	11	1.82	0.2042					Treat	1	11	1.71	0.2179					Treat	1	14	4.3	0.0571					Treat	1	14	3.27	0.0923					Treat	1	14	0.7
	Variety	3	11	0.99	0.4324					Variety	3	11	1.36	0.3059					Variety	3	11	1.33	0.314					Variety	4	14	3.33	0.0411					Variety	4	14	3.06	0.0522					Variety	4	14	0.69
	Treat*Variety	3	11	1.96	0.1787					Treat*Variety	3	11	1.78	0.2082					Treat*Variety	3	11	1.66	0.2335					Treat*Variety	4	14	3.61	0.0319					Treat*Variety	4	14	3.43	0.0376					Treat*Variety	4	14	0.72
	Least Squares Means									Least Squares Means									Least Squares Means									Least Squares Means									Least Squares Means									Least Squares Means
	Effect	Treat	Variety	Estimate	Standard	DF	t Value	Pr > |t|		Effect	Treat	Variety	Estimate	Standard	DF	t Value	Pr > |t|		Effect	Treat	Variety	Estimate	Standard	DF	t Value	Pr > |t|		Effect	Treat	Variety	Estimate	Standard	DF	t Value	Pr > |t|		Effect	Treat	Variety	Estimate	Standard	DF	t Value	Pr > |t|		Effect	Treat	Variety	Estimate
					Error									Error									Error									Error									Error
	Treat	AMF		2.5529	0.1365	11	18.7	<.0001		Treat	AMF		3.6011	0.1269	11	28.37	<.0001		Treat	AMF		3.6026	0.1248	11	28.87	<.0001		Treat	AMF		3.6827	0.08866	14	41.53	<.0001		Treat	AMF		3.695	0.08844	14	41.78	<.0001		Treat	AMF		3.716
	Treat	ST		2.5294	0.1827	11	13.84	<.0001		Treat	ST		3.3901	0.1853	11	18.29	<.0001		Treat	ST		3.4021	0.1819	11	18.7	<.0001		Treat	ST		3.4143	0.1475	14	23.15	<.0001		Treat	ST		3.4618	0.147	14	23.54	<.0001		Treat	ST		3.6005
	Treat*Variety	AMF	Isl-pur	3.2293	0.1566	11	20.62	<.0001		Treat*Variety	AMF	Isl-pur	3.4811	0.1539	11	22.62	<.0001		Treat*Variety	AMF	Isl-pur	3.4819	0.1511	11	23.04	<.0001		Treat*Variety	AMF	Isl-pur	3.6539	0.1884	14	19.39	<.0001		Treat*Variety	AMF	Isl-pur	3.6531	0.188	14	19.44	<.0001		Treat*Variety	AMF	Isl-pur	3.8128
	Treat*Variety	AMF	JEDI	2.0297	0.4463	11	4.55	0.0008		Treat*Variety	AMF	JEDI	3.3662	0.4399	11	7.65	<.0001		Treat*Variety	AMF	JEDI	3.3679	0.4325	11	7.79	<.0001		Treat*Variety	AMF	JEDI	3.5701	0.3207	14	11.13	<.0001		Treat*Variety	AMF	JEDI	3.568	0.32	14	11.15	<.0001		Treat*Variety	AMF	JEDI	3.5688
	Treat*Variety	AMF	Mam	2.3816	0.128	11	18.6	<.0001		Treat*Variety	AMF	Mam	3.7672	0.1237	11	30.46	<.0001		Treat*Variety	AMF	Mam	3.7692	0.1214	11	31.05	<.0001		Treat*Variety	AMF	Mam	3.9749	0.1115	14	35.66	<.0001		Treat*Variety	AMF	Mam	3.9742	0.1112	14	35.74	<.0001		Treat*Variety	AMF	Mam	3.9829
	Treat*Variety	AMF	Shishito	2.5712	0.1633	11	15.74	<.0001		Treat*Variety	AMF	Shishito	3.79	0.1591	11	23.81	<.0001		Treat*Variety	AMF	Shishito	3.7913	0.1564	11	24.24	<.0001		Treat*Variety	AMF	Milena	3.4942	0.1944	14	17.98	<.0001		Treat*Variety	AMF	Milena	3.4968	0.194	14	18.02	<.0001		Treat*Variety	AMF	Milena	3.3935
	Treat*Variety	ST	Isl-pur	2.8642	0.1004	11	28.54	<.0001		Treat*Variety	ST	Isl-pur	3.35	0.09	11	37.22	<.0001		Treat*Variety	ST	Isl-pur	3.3687	0.08836	11	38.12	<.0001		Treat*Variety	AMF	Shishito	3.7204	0.1105	14	33.67	<.0001		Treat*Variety	AMF	Shishito	3.783	0.1102	14	34.32	<.0001		Treat*Variety	AMF	Shishito	3.8218
	Treat*Variety	ST	JEDI	1.943	0.5733	11	3.39	0.006		Treat*Variety	ST	JEDI	3.4614	0.5664	11	6.11	<.0001		Treat*Variety	ST	JEDI	3.4595	0.5568	11	6.21	<.0001		Treat*Variety	ST	Isl-pur	3.6903	0.1168	14	31.6	<.0001		Treat*Variety	ST	Isl-pur	3.6899	0.1165	14	31.67	<.0001		Treat*Variety	ST	Isl-pur	3.799
	Treat*Variety	ST	Mam	2.2899	0.1394	11	16.43	<.0001		Treat*Variety	ST	Mam	3.8744	0.1356	11	28.56	<.0001		Treat*Variety	ST	Mam	3.8752	0.1332	11	29.1	<.0001		Treat*Variety	ST	JEDI	3.5827	0.4509	14	7.95	<.0001		Treat*Variety	ST	JEDI	3.5796	0.45	14	7.95	<.0001		Treat*Variety	ST	JEDI	3.5824
	Treat*Variety	ST	Shishito	3.0207	0.4287	11	7.05	<.0001		Treat*Variety	ST	Shishito	2.8747	0.4497	11	6.39	<.0001		Treat*Variety	ST	Shishito	2.9047	0.4416	11	6.58	<.0001		Treat*Variety	ST	Mam	4.0213	0.1266	14	31.77	<.0001		Treat*Variety	ST	Mam	4.0203	0.1263	14	31.84	<.0001		Treat*Variety	ST	Mam	4.0312
																												Treat*Variety	ST	Milena	3.1204	0.1857	14	16.81	<.0001		Treat*Variety	ST	Milena	3.1231	0.1854	14	16.85	<.0001		Treat*Variety	ST	Milena	3.5453
																												Treat*Variety	ST	Shishito	2.6567	0.5399	14	4.92	0.0002		Treat*Variety	ST	Shishito	2.896	0.5384	14	5.38	<.0001		Treat*Variety	ST	Shishito	3.0445
[truncated: 60 more columns]
